# Supplementary material for: First-principles study of mercaptoundecanoic acid molecule adsorption and gas molecule penetration onto silver surface: an insight for corrosion protection
Source: Royal Society of Chemistry journal article supplement (doi:10.1039/d3ra06040c), 2023-01-01
Supplement: d3ra06040c1.pdf [file d3ra06040c1.pdf]

# Electronic Supplementary Information – First-principles study of mercaptoundecanoic acid molecule adsorption and gas molecule penetration onto silver surface: An insight for corrosion protection

Chung-Hyok Kim<sup>a</sup>, Chol Ryu<sup>b</sup>, Yong-Hak Ro<sup>a</sup>, Song-Il O<sup>c</sup>, Chol-Jun Yu<sup>a\*</sup>

<sup>a</sup>*Institute of Electronic Materials, High-Tech and Development Centre, Kim Il Sung University,  
Pyongyang, PO Box 76, Democratic People's Republic of Korea*

<sup>b</sup>*Computational Materials Design (CMD), Faculty of Materials Science, Kim Il Sung University,  
Pyongyang, PO Box 76, Democratic People's Republic of Korea*

<sup>c</sup>*Physics Department, O Jung Hub Chongjin University of Education,  
Chongjin, Hamgyong North Province, Democratic People's Republic of Korea*

Table 1: Bond length and bond angle of MUA molecule determined using different DFT programs including pseudopotential-PAO program SIESTA, pseudopotential plane wave program Quantum ESPRESSO (QE), and density functional tight binding program DFTB.

|                  | SIESTA | QE     | DFTB   |
|------------------|--------|--------|--------|
| Bond length (Å)  |        |        |        |
| S1-H1            | 1.353  | 1.355  | 1.331  |
| S1-C1            | 1.826  | 1.828  | 1.825  |
| C1-H2            | 1.090  | 1.103  | 1.090  |
| C1-H3            | 1.087  | 1.104  | 1.089  |
| C1-C2            | 1.520  | 1.525  | 1.517  |
| C2-H4            | 1.104  | 1.107  | 1.093  |
| C2-H5            | 1.092  | 1.105  | 1.091  |
| C2-C3            | 1.526  | 1.530  | 1.525  |
| C3-H6            | 1.100  | 1.107  | 1.092  |
| C3-H7            | 1.109  | 1.107  | 1.092  |
| C4-H8            | 1.091  | 1.104  | 1.091  |
| C4-H9            | 1.104  | 1.105  | 1.091  |
| C4-C5            | 1.524  | 1.527  | 1.524  |
| C5-H10           | 1.101  | 1.107  | 1.093  |
| C5-H11           | 1.096  | 1.105  | 1.092  |
| C5-C6            | 1.516  | 1.513  | 1.506  |
| C6-O1            | 1.373  | 1.366  | 1.338  |
| C6-O2            | 1.217  | 1.216  | 1.203  |
| O1-H12           | 0.989  | 0.988  | 0.970  |
| Bond angle (deg) |        |        |        |
| H1-S1-C1         | 93.48  | 96.41  | 95.82  |
| H2-C1-H3         | 106.21 | 106.84 | 108.97 |
| H4-C2-H5         | 108.04 | 105.93 | 107.78 |
| H6-C3-H7         | 103.59 | 105.83 | 107.62 |
| H8-C4-H9         | 104.99 | 105.78 | 107.54 |
| H10-C5-H11       | 102.65 | 104.76 | 106.75 |
| O1-C6-O2         | 122.45 | 122.25 | 122.05 |
| S1-C1-C2         | 115.05 | 114.44 | 111.99 |
| C1-C2-C3         | 113.04 | 112.92 | 111.23 |
| C4-C5-C6         | 118.64 | 117.68 | 114.41 |
| C5-C6-O2         | 124.51 | 124.54 | 124.53 |
| C5-C6-O1         | 113.04 | 113.21 | 113.42 |

\*Corresponding author: Chol-Jun Yu, Email: cj.yu@ryongnamsan.edu.kp

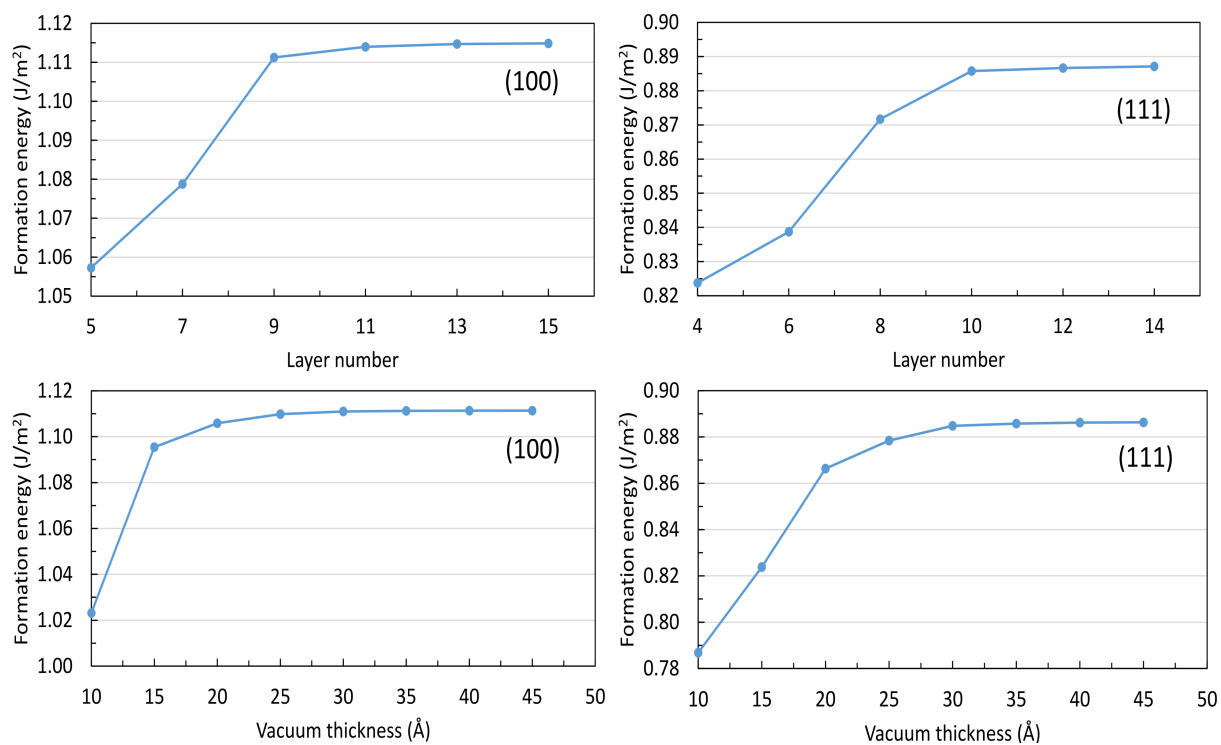

Fig. S1 Convergence test for formation energies of Ag(1 0 0) and (1 1 1) surfaces with respect to the number of layers (top panel) and vacuum thickness (bottom panel).

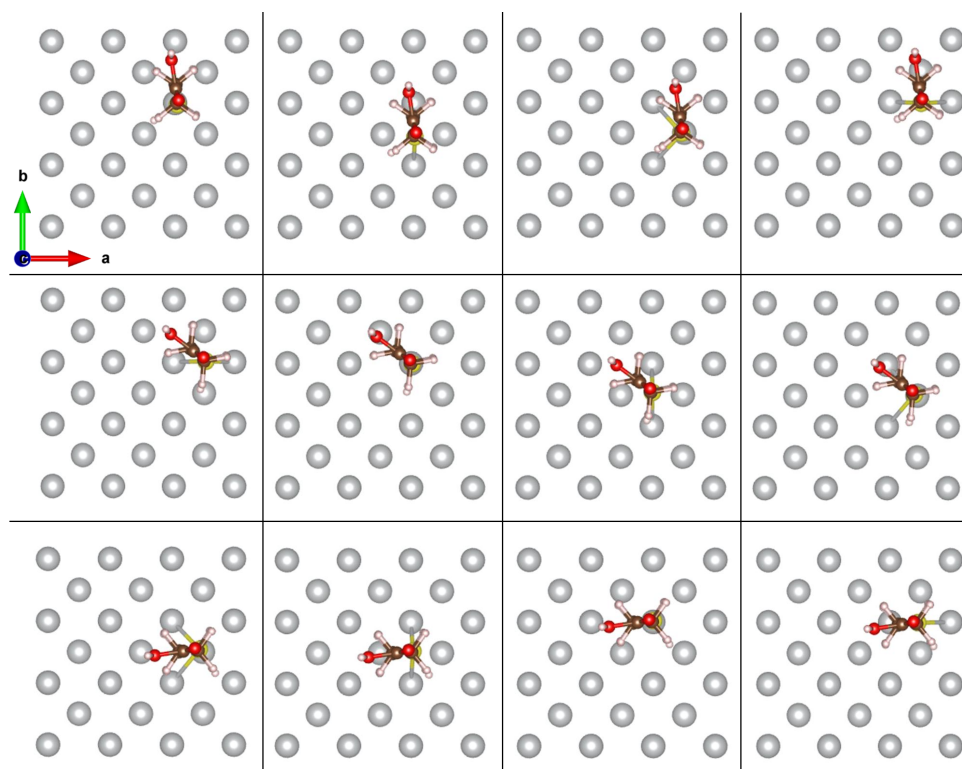

Fig. S2 Different positions of MUA adsorption on Ag(1 0 0) (3 × 3) surface cell.

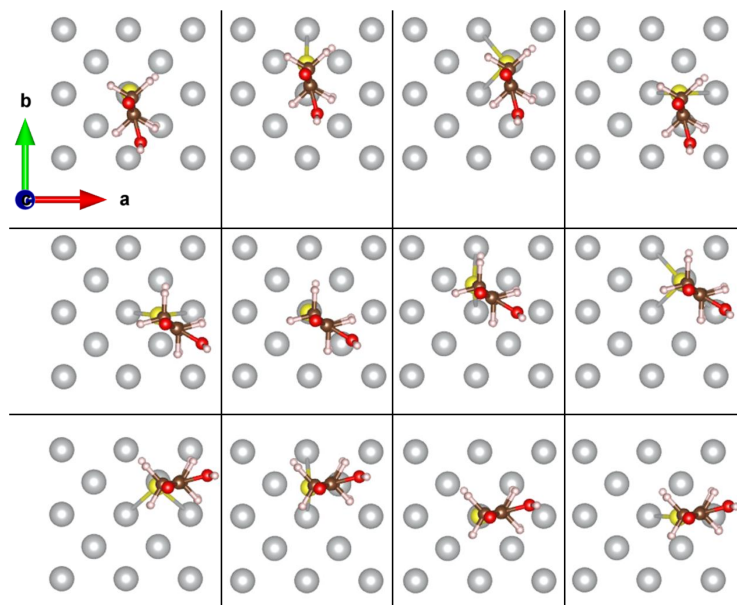

Fig. S3 Different positions of MUA adsorption on Ag(1 0 0) ( $2 \times 2$ ) surface cell.

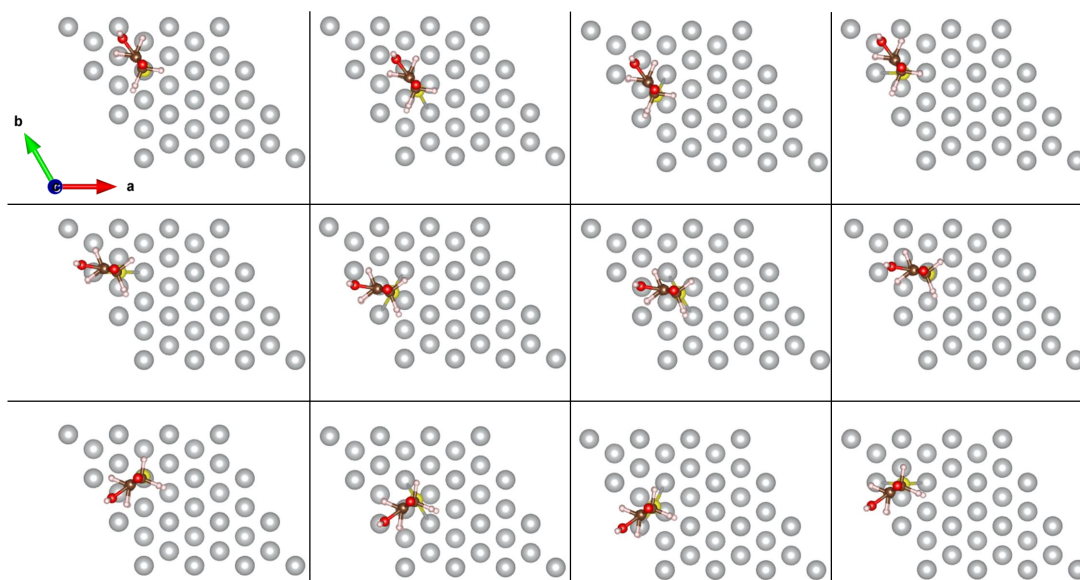

Fig. S4 Different positions of MUA adsorption on Ag(1 1 1) ( $3 \times 3$ ) surface cell.

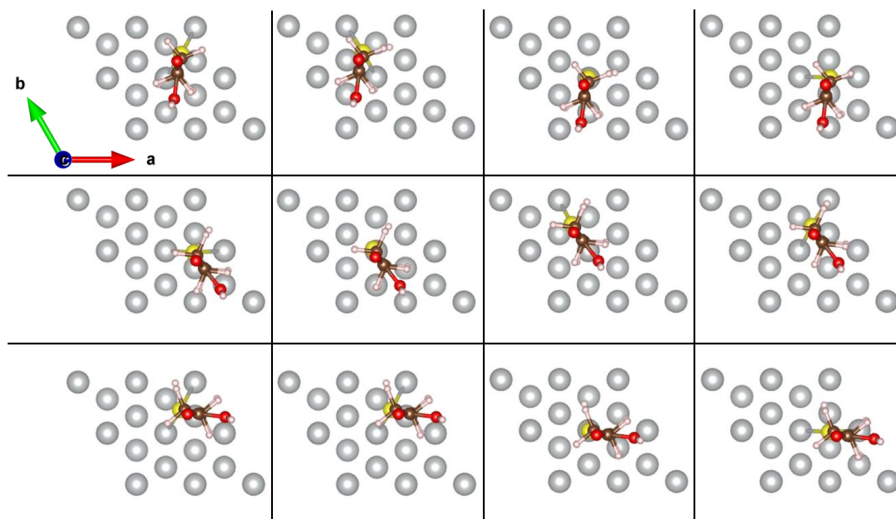

Fig. S5 Different positions of MUA adsorption on Ag(1 1 1) ( $2 \times 2$ ) surface cell.

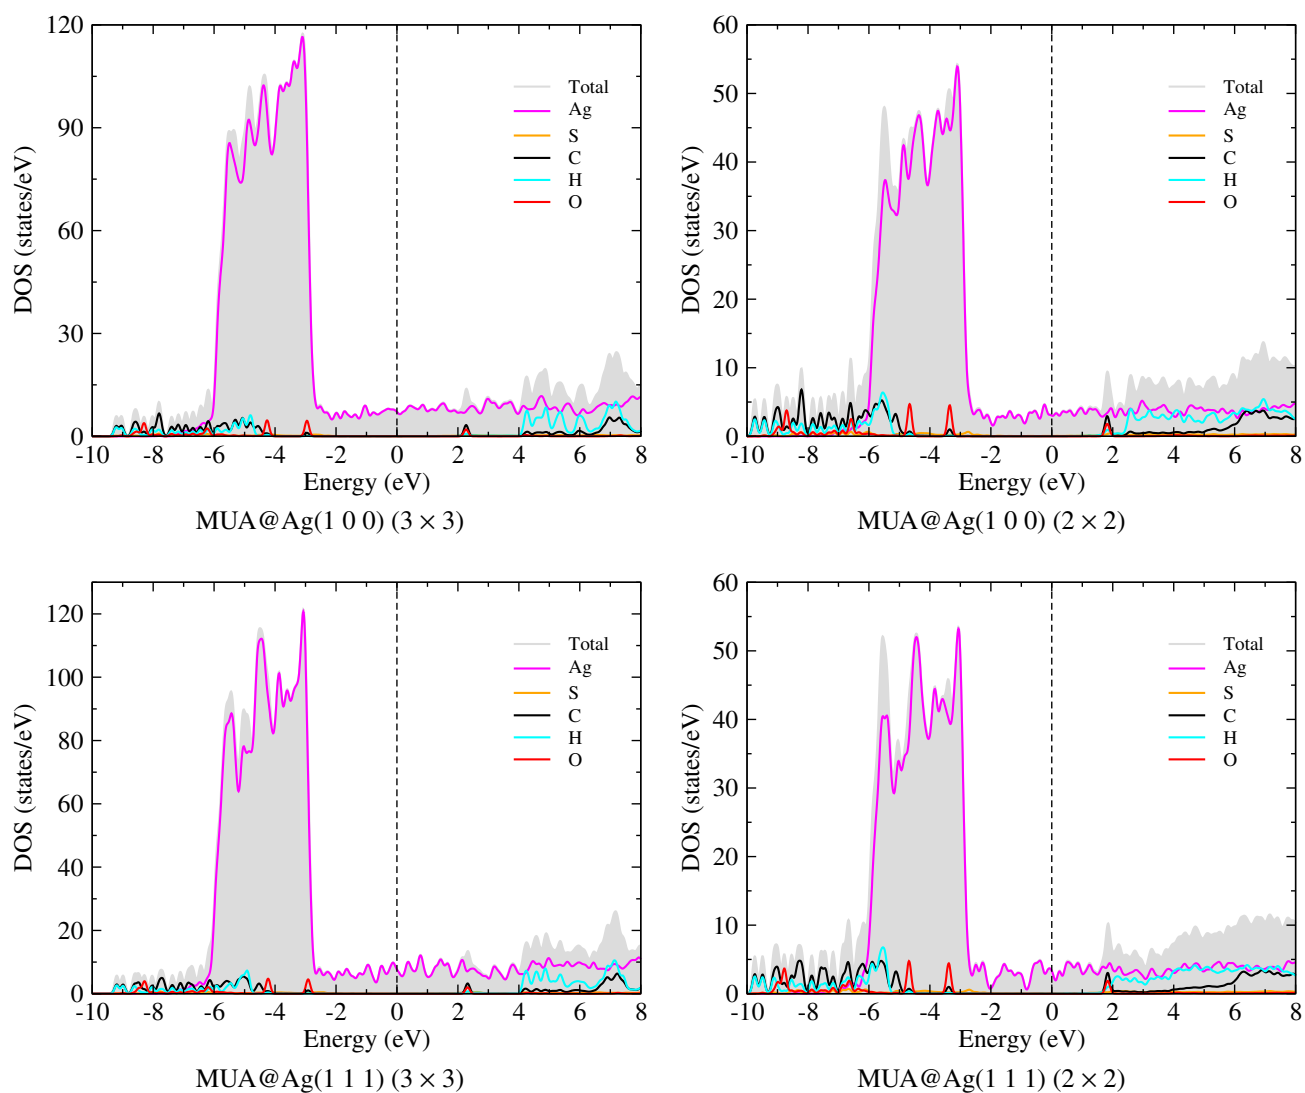

Fig. S6 Atom-projected density of states (DOS) in MUA-adsorbed Ag(1 0 0) and (1 1 1) surface complexes.

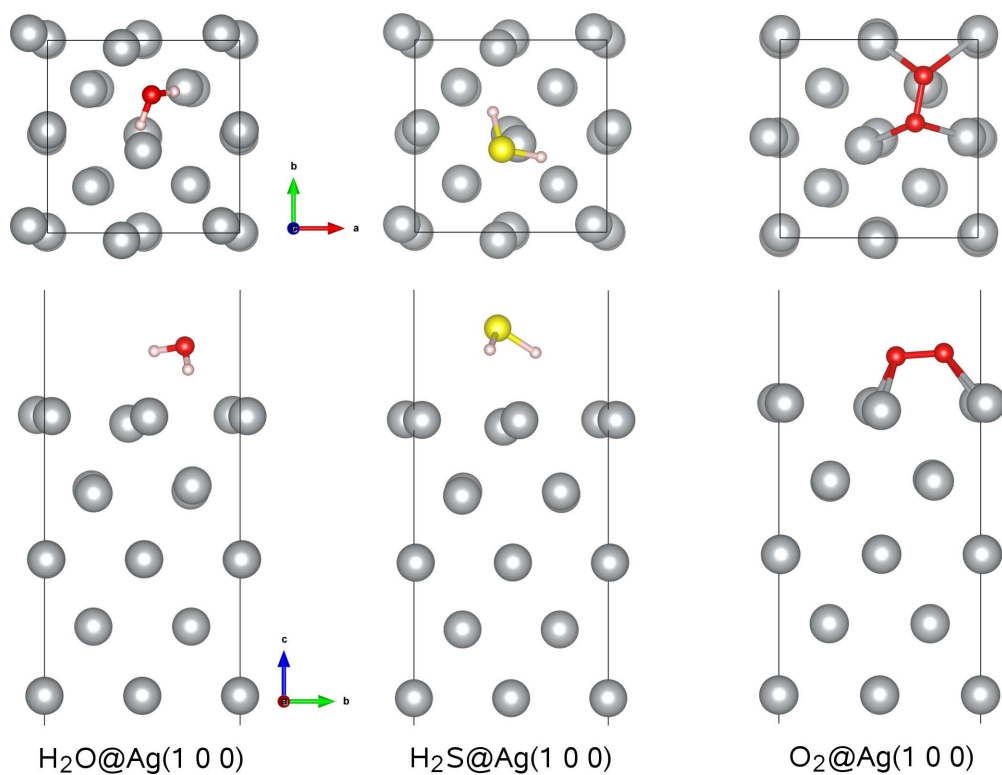

Fig. S7 Optimized geometries of small molecule adsorbed Ag(1 0 0) complexes.

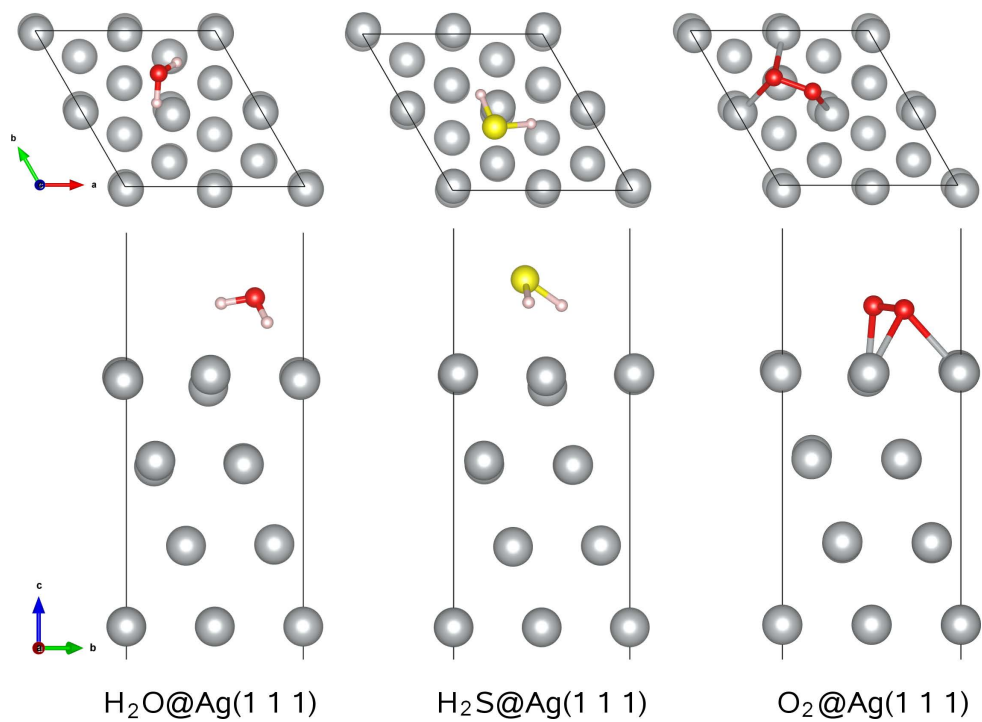

Fig. S8 Optimized geometries of small molecule adsorbed Ag(1 1 1) complexes.

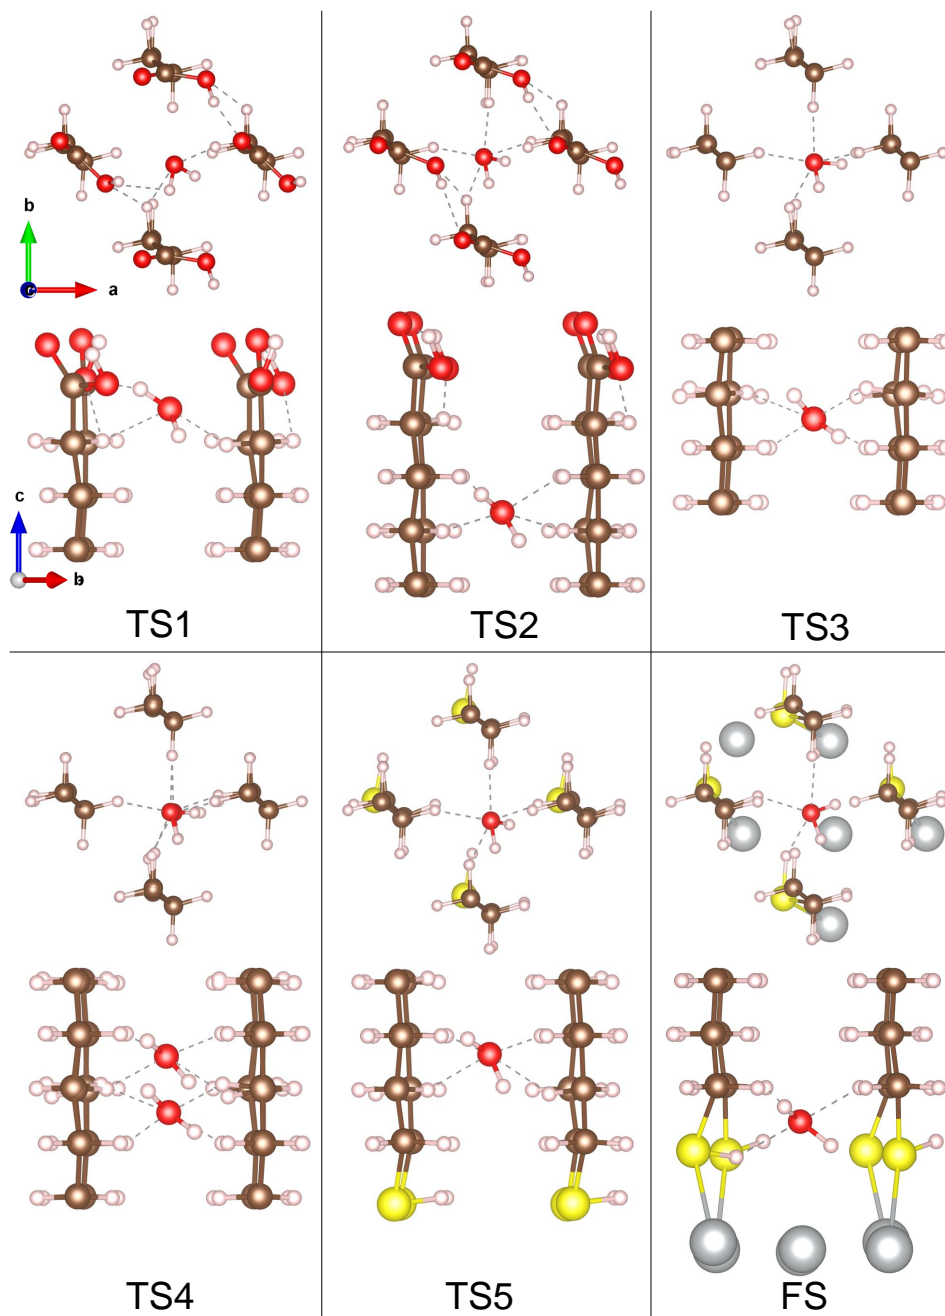

Fig. S9 Geometries of transition states (TS) and final state (FS) for H<sub>2</sub>O migration in MUA@Ag(1 0 0) complex.



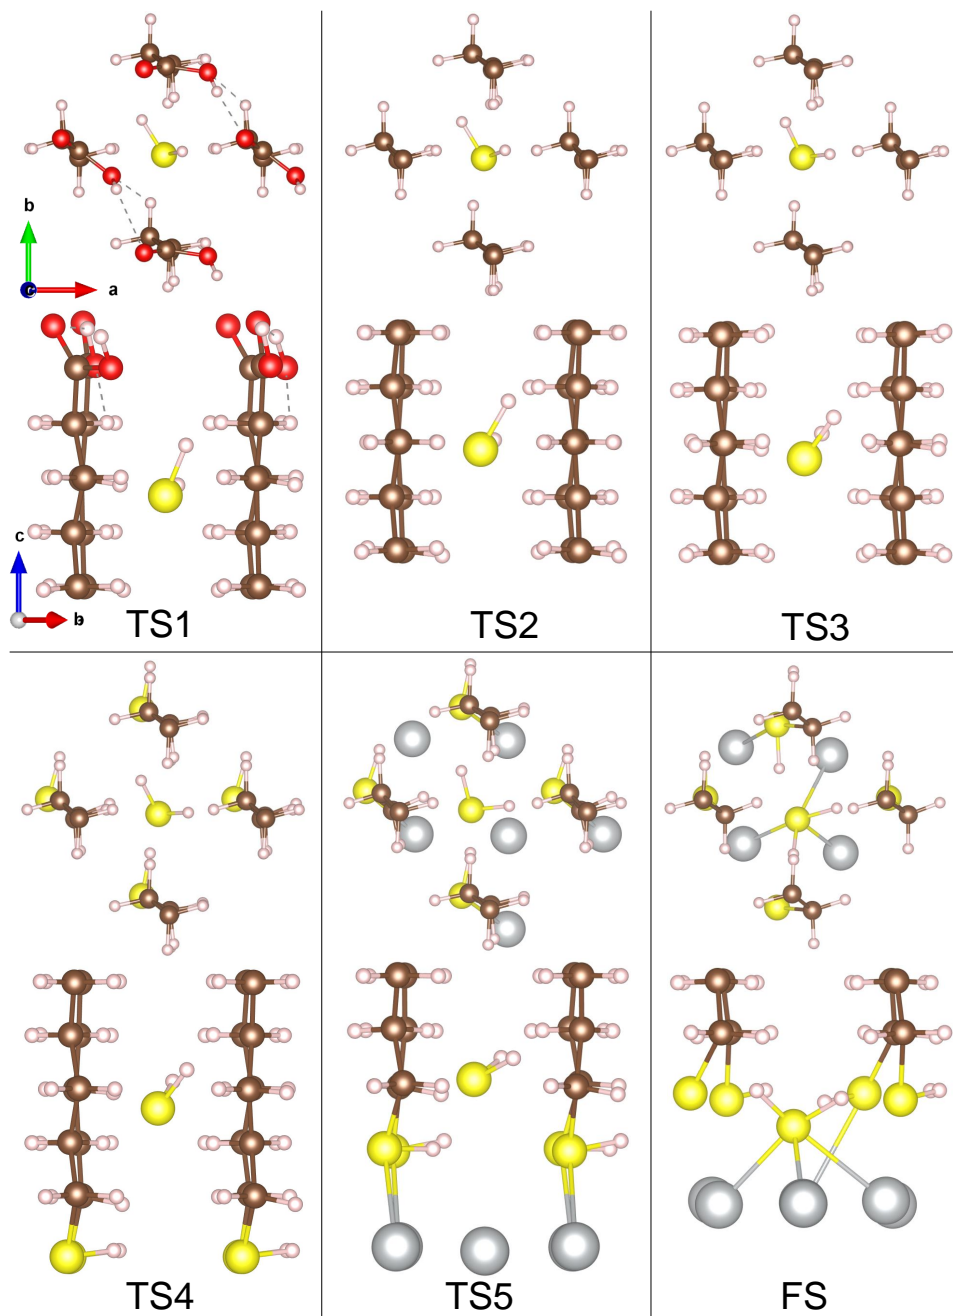

Fig. S10 Geometries of transition states (TS) and final state (FS) for H<sub>2</sub>S migration in MUA@Ag(1 0 0) complex.

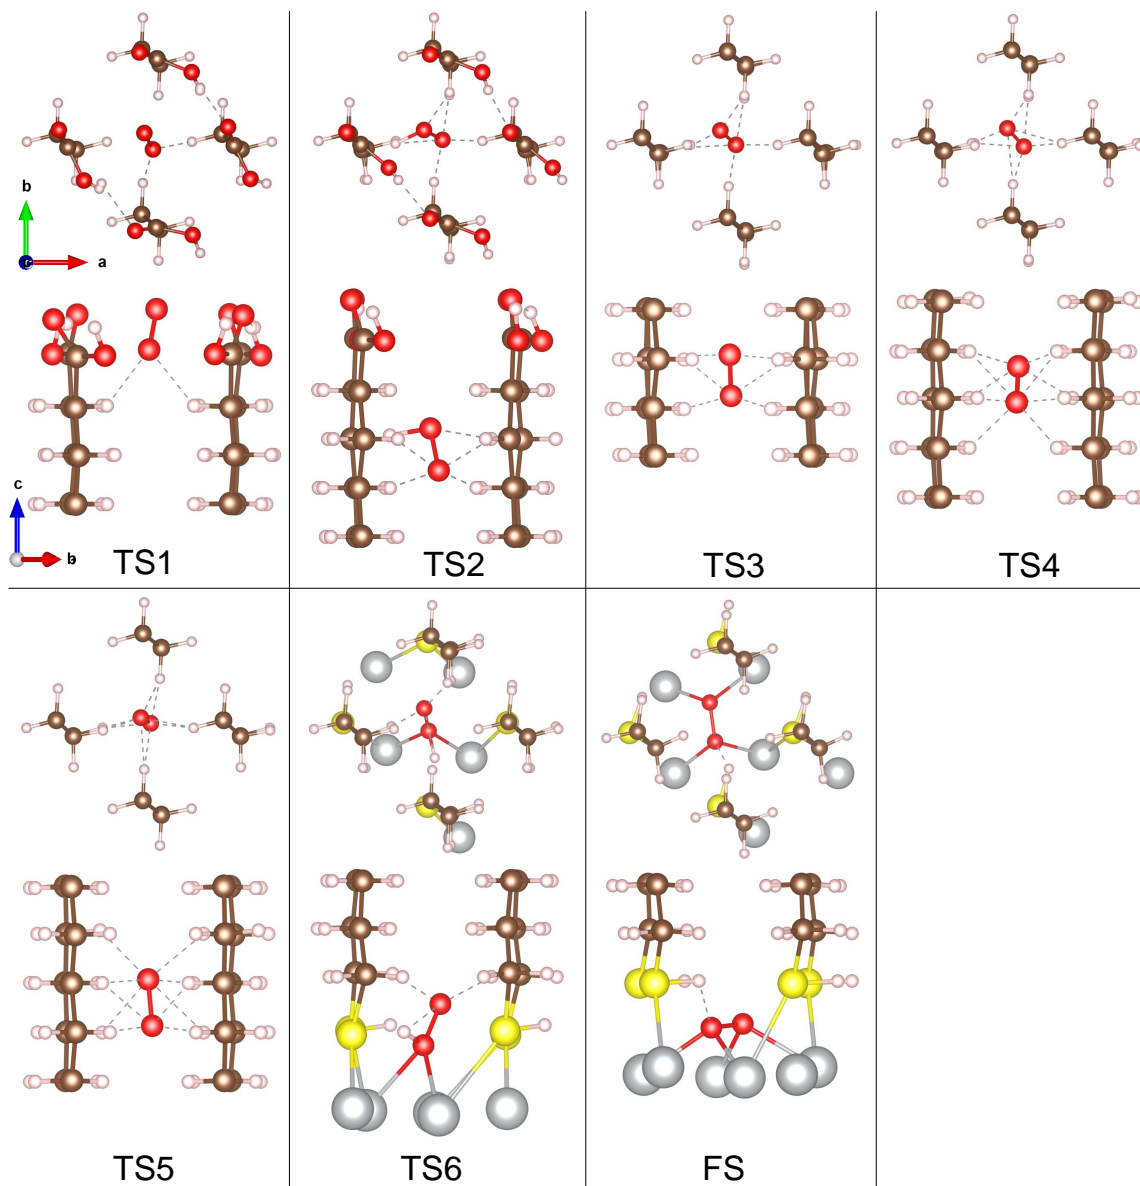

Fig. S11 Geometries of transition states (TS) and final state (FS) for  $O_2$  migration in MUA@Ag(1 0 0) complex.



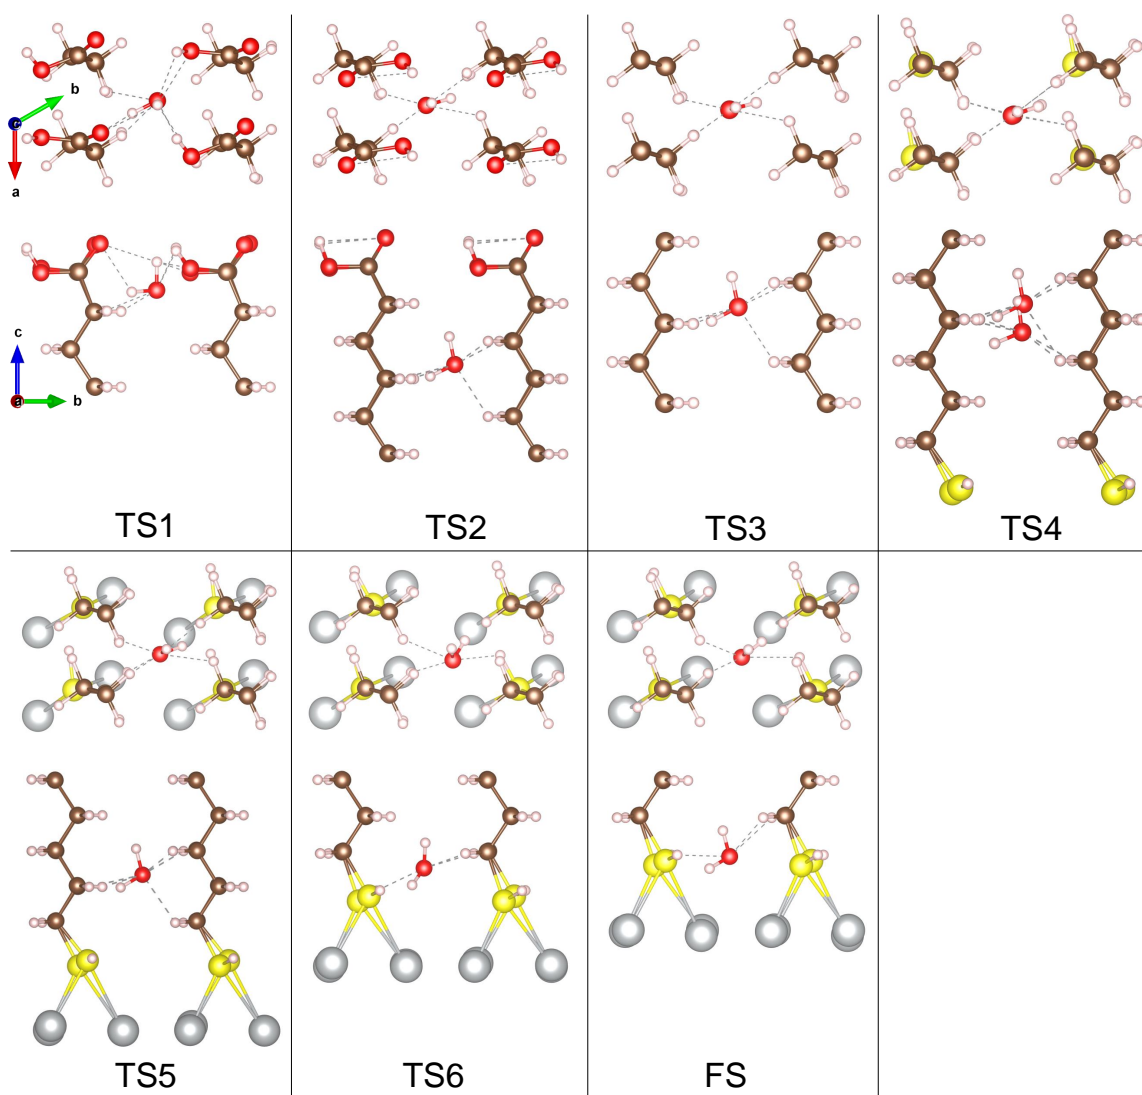

Fig. S12 Geometries of transition states (TS) and final state (FS) for H<sub>2</sub>O migration in MUA@Ag(1 1 1) complex.

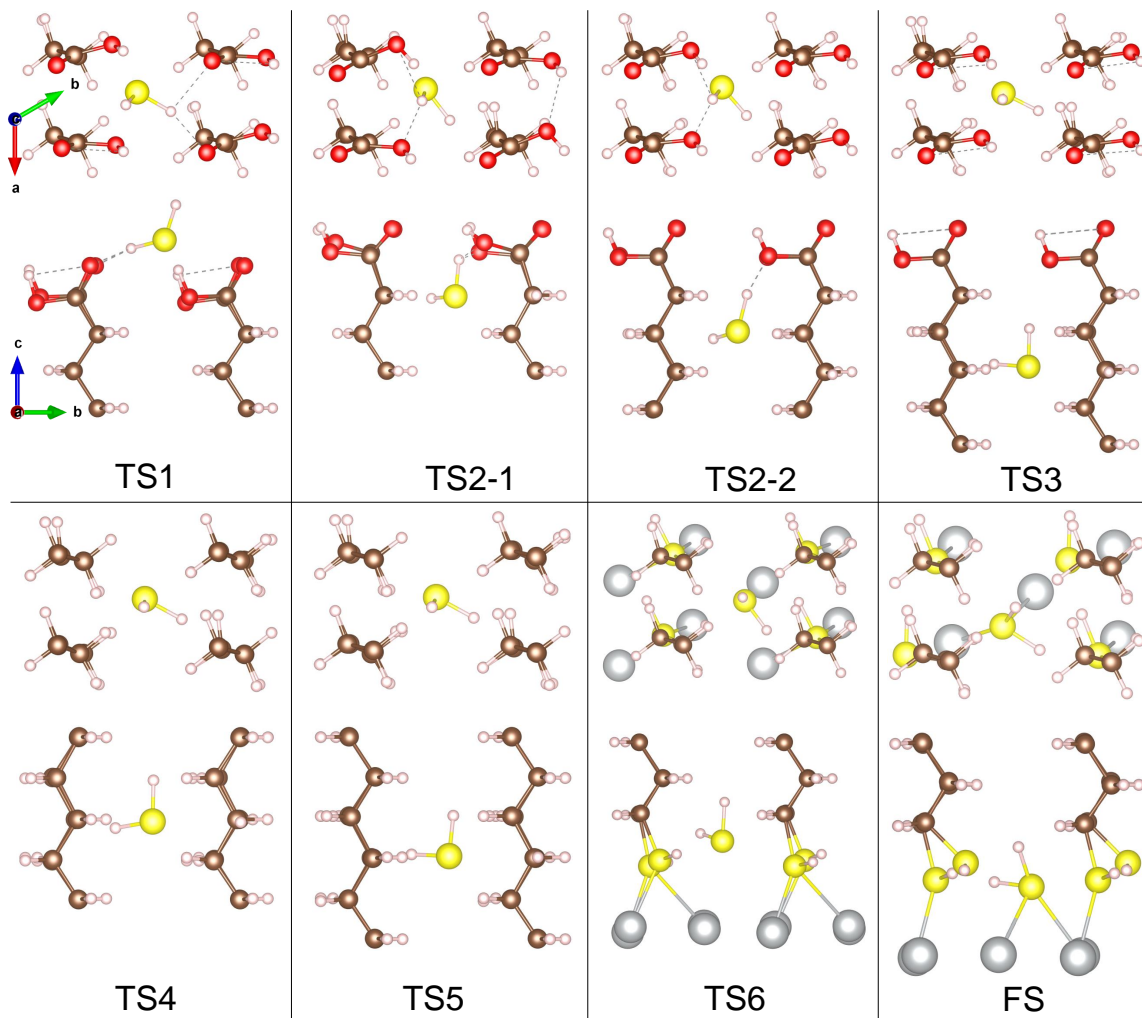

Fig. S13 Geometries of transition states (TS) and final state (FS) for H<sub>2</sub>S migration in MUA@Ag(1 1 1) complex.

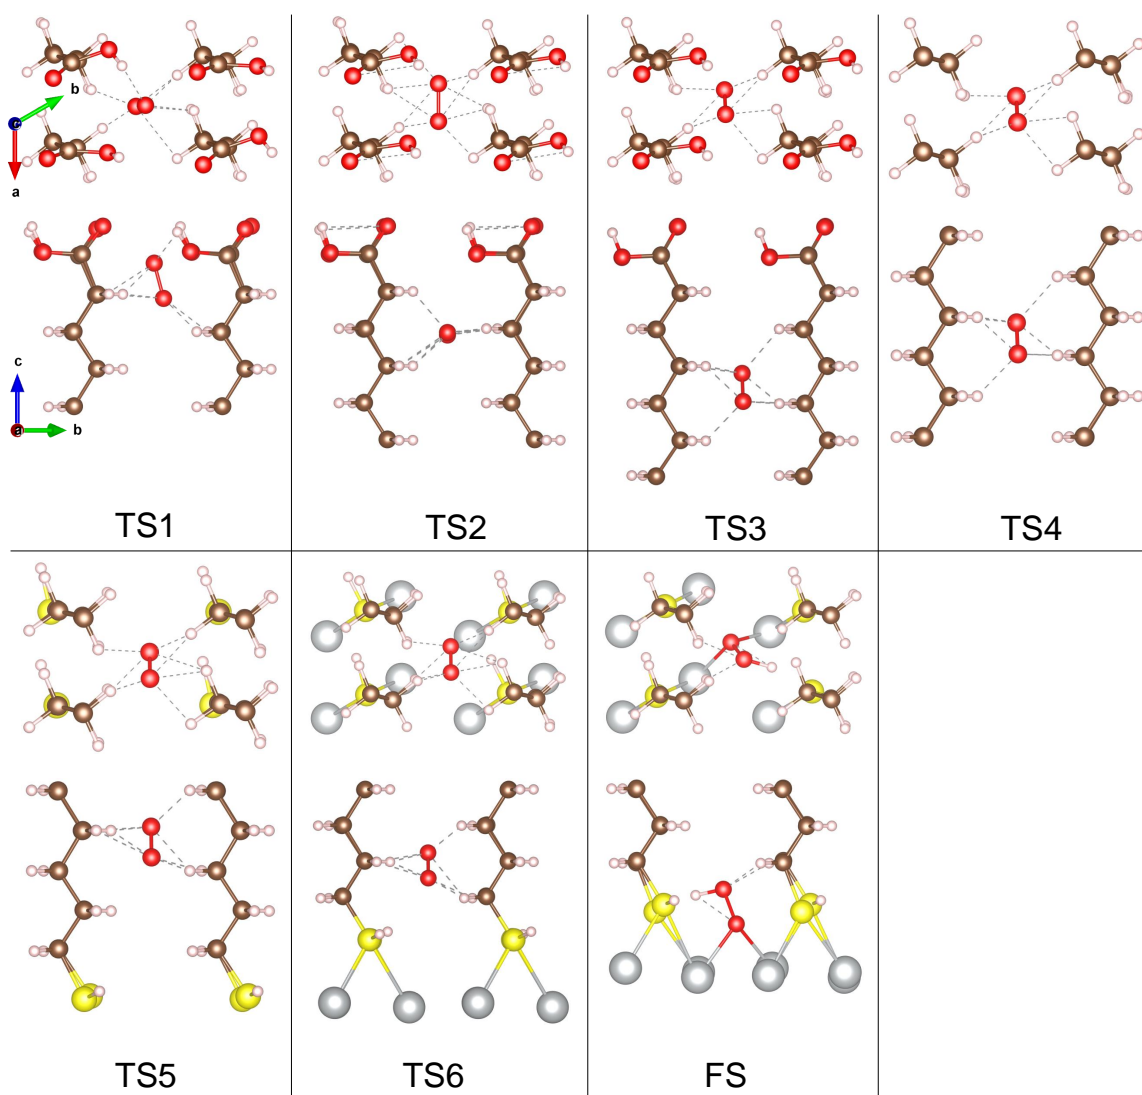

Fig. S14 Geometries of transition states (TS) and final state (FS) for O<sub>2</sub> migration in MUA@Ag(1 1 1) complex.
